# Supplementary material for: Correlation between gross motor coordination and basic coordination capacities in normal-weight and overweight/obese children aged 9–10 years
Source: PeerJ journal article supplement (doi:10.7717/peerj.17865), 2024-08-09
Supplement: RawData.xlsx [file RawData.xlsx]

## Sheet: Sheet1
Number	Gender	body mass index (kg/m2)	Walking backward (points)	Hopping for height (points)	Jumping sideways (points)	Moving sideways (points)	Motor quotient (points)	Target stand broad jumping (cm)	numbered medicine ball running (s)	Single leg standing (s)	Y-balance (%)	Motor reaction (s)	rhythm ability (s)
227	male	14.92	117	100	127	87	107.75	3.23	1.894	60	107	0.46	2.113
228	male	14.94	93	110	130	96	107.25	3.6	3.157	50.1	101	0.51	2.401
1	male	14.98	79	93	115	86	93.25	6.63	1.92	36.2	100	0.54	2.03
44	male	14.98	90	79	97	92	89.5	5.22	1.564	13.58	76	0.48	2.44
90	male	14.98	108	90	125	81	101	8.5	1.459	43.2	88	0.49	3.227
122	male	15.05	82	103	127	109	105.25	7.5	2.107	60	93.5	0.4	2.472
222	male	15.1	79	89	106	73	86.75	4.77	3.964	35.9	104.5	0.45	3.125
112	male	15.12	90	93	124	84	97.75	2.67	5.243	50.39	91.5	0.42	1.713
251	male	15.19	95	91	102	87	93.75	5.93	1.778	60	95	0.47	1.92
130	male	15.27	84	88	110	84	91.5	4.52	4.565	60	94.5	0.39	2.902
299	male	15.28	72	76	109	86	85.75	13.35	2.902	40.65	108.5	0.48	1.326
113	male	15.32	66	88	117	99	92.5	6.78	4.875	60	87.5	0.54	2.641
255	male	15.32	97	92	111	92	98	9.47	2.083	20.5	104	0.49	1.792
75	male	15.35	105	99	126	84	103.5	12.87	0.899	60	89.5	0.45	1.215
125	male	15.38	90	86	115	94	96.25	4.92	1.524	60	83	0.54	2.776
49	male	15.48	77	92	120	84	93.25	4.4	2.886	36.76	96	0.53	1.453
294	male	15.51	69	81	110	92	88	3.33	1.426	20.95	82	0.46	2.715
50	male	15.52	65	77	106	79	81.75	7.68	4.133	29.65	71	0.5	2.952
19	male	15.55	96	101	133	82	103	4.57	3.975	35.4	103.5	0.51	2.27
85	male	15.63	84	95	92	91	90.5	18.65	1.168	46.1	98	0.48	2.473
48	male	15.66	95	96	117	88	99	7.37	5.836	60	91.5	0.53	2.49
217	male	15.66	76	78	103	82	84.75	4.18	3.448	10.35	103	0.45	2.805
198	male	15.71	92	98	131	110	107.75	3.75	0.911	60	103.5	0.44	1.462
124	male	15.72	91	90	91	104	94	2.9	0.752	39.36	92	0.51	3.042
155	male	15.78	77	77	94	97	86.25	9.68	3.212	42.16	95.5	0.5	2.056
15	male	15.84	67	93	124	86	92.5	6.87	3.478	9.95	94	0.5	2.6
42	male	15.94	75	88	113	79	88.75	7.72	4.378	44.16	87.5	0.5	2.96
118	male	15.94	84	93	119	77	93.25	3.65	2.639	60	96	0.49	2.153
14	male	16.33	78	100	104	88	92.5	6.65	3.024	35.5	90.5	0.5	1.51
127	male	16.37	72	88	141	81	95.5	10.03	5.665	60	94	0.57	1.749
20	male	16.44	85	92	117	92	96.5	6.77	1.725	60	91.5	0.48	2.42
258	male	16.48	94	75	115	90	93.5	6.5	2.953	58	77.5	0.49	2.628
259	male	16.5	124	91	108	77	100	8.32	8.468	60	93.5	0.53	1.941
56	male	16.51	91	86	126	99	100.5	4.3	4.608	47.3	89.5	0.56	2.001
230	male	16.58	85	114	125	89	103.25	7.57	2.196	60	89.5	0.43	1.76
194	male	16.6	53	91	88	69	75.25	20.02	5.48	5.79	69.5	0.56	3.239
192	male	16.61	84	91	129	89	98.25	7.82	1.069	2	91.5	0.45	1.925
260	male	16.65	103	80	102	60	86.25	3.87	1.335	25	92	0.47	2.27
267	male	16.71	77	96	105	73	87.75	1.97	2.983	37.5	93.5	0.52	2.398
129	male	16.72	75	90	130	84	94.75	7.92	3.15	31.5	79	0.52	2.198
91	male	16.8	72	85	117	105	94.75	6.82	0.94	60	88.5	0.48	2.369
2	male	16.93	67	64	79	51	65.25	15.1	6.203	17.75	86.5	0.64	1.92
183	male	17.09	70	101	117	116	101	8.37	2.254	36.91	90.5	0.43	2.479
82	male	17.1	77	88	117	86	92	10.83	0	18.45	91.5	0.51	1.464
93	male	17.11	94	96	127	82	99.75	7.77	0.642	60	99	0.38	1.8
83	male	17.14	75	80	104	88	86.75	8.75	0	53.8	90.5	0.4	1.142
88	male	17.27	65	85	123	94	91.75	8.57	2.825	18.35	83	0.7	2.59
117	male	17.4	64	70	88	67	72.25	5.52	1.036	55	78.5	0.36	2.707
17	male	17.48	55	77	112	75	79.75	8.1	1.478	17.85	78.5	0.56	2.26
301	male	18.11	55	83	120	79	84.25	5.75	0.528	15.6	89.5	0.52	2.539
242	male	14.96	87	75	109	73	86	10.62	2.117	48.55	83	0.52	1.751
308	male	15.01	104	99	130	73	101.5	1.65	2.92	49.2	94.5	0.49	2.652
104	male	15.03	112	99	113	86	102.5	6.83	2.804	59.1	86.5	0.51	3.015
143	male	15.14	90	79	110	82	90.25	4.9	1.787	60	83	0.5	2.613
312	male	15.14	69	83	99	79	82.5	5.07	2.077	57.15	91	0.57	2.899
234	male	15.15	78	106	111	92	96.75	4.97	1.873	39.35	98	0.53	2.032
178	male	15.17	112	86	103	82	95.75	5.1	1.303	60	100	0.44	1.546
145	male	15.2	104	93	120	96	103.25	10.13	2.739	60	96.5	0.51	1.864
283	male	15.2	76	76	92	73	79.25	7.48	2.129	60	90.5	0.52	3.293
246	male	15.3	84	84	116	77	90.25	2.38	2.09	30.5	100.5	0.53	1.581
204	male	15.31	87	85	116	87	93.75	7.8	0.609	5.08	117.5	0.48	2.816
248	male	15.33	90	85	85	75	83.75	9.92	1.956	60	97.5	0.5	2.715
65	male	15.42	75	91	112	90	92	9.37	2.349	60	94	0.61	3.279
238	male	15.43	62	70	83	73	72	7.7	1.155	35.05	83.5	0.54	3.268
201	male	15.44	110	109	123	97	109.75	6.82	0.732	60	107.5	0.46	1.734
28	male	15.47	87	102	119	107	103.75	6.45	3.763	60	78.5	0.44	1.84
306	male	15.48	98	84	125	86	98.25	4.08	1.052	51.95	94.5	0.54	2.046
29	male	15.55	99	75	98	79	87.75	6.45	3.458	60	89.5	0.51	3.68
69	male	15.56	97	82	121	90	97.5	4.87	2.062	26.75	91	0.49	1.924
271	male	15.56	106	88	106	73	93.25	3.28	3.909	60	84	0.52	2.042
235	male	15.57	104	86	103	74	91.75	13.05	0.842	23.75	118	0.38	2.88
165	male	15.59	85	77	107	70	84.75	3.83	0.804	47.22	99	0.45	1.748
66	male	15.62	77	70	109	84	85	8.05	2.488	37.73	90.5	0.5	2.939
135	male	15.65	107	86	76	73	85.5	3.73	4.408	60	75.5	0.62	3.472
133	male	15.66	93	111	108	99	102.75	6.05	2.308	34.01	84.5	0.5	3.1
103	female	15.68	64	74	123	101	90.5	14.32	0.719	15.55	103	0.43	1.777
280	female	15.7	84	75	112	100	92.75	1.67	1.471	60	88	0.52	1.804
179	female	15.77	127	91	115	82	103.75	4.85	2.058	60	82.5	0.45	2.235
213	female	15.77	100	89	115	92	99	3.83	3.966	15.32	98	0.46	2.264
108	female	15.8	64	75	98	77	78.5	11.33	1.252	31.55	93	0.55	2.69
316	female	15.81	102	81	127	89	99.75	8.77	0.626	60	88.5	0.45	2.378
209	female	15.83	47	69	73	60	62.25	3.63	5.787	60	79	0.64	2.835
96	female	15.86	110	99	108	114	107.75	5.62	0.425	60	95.5	0.51	3.292
175	female	15.92	90	80	111	87	92	7.52	5.475	60	83	0.53	3.178
203	female	15.95	72	101	98	82	88.25	4.9	1.795	50.92	83.5	0.59	2.301
94	female	15.98	88	87	105	96	94	5.23	0.757	47.35	98.5	0.46	1.996
67	female	16.04	79	88	111	79	89.25	7.62	0.986	38.16	100.5	0.56	2.652
311	female	16.13	114	75	108	79	94	9.87	5.35	60	100	0.5	3.739
34	female	16.17	86	81	104	71	85.5	3.25	2.266	60	101	0.54	1.89
134	female	16.19	99	64	105	86	88.5	4.18	2.906	60	88.5	0.53	1.983
98	female	16.22	71	91	108	86	89	2.9	2.191	24.35	87.5	0.51	2.821
25	female	16.27	82	89	102	82	88.75	2.4	1.014	43.25	79.5	0.5	3.13
27	female	16.28	92	79	111	82	91	5.75	2.901	53.15	68.5	0.5	2.14
142	female	16.33	106	79	95	77	89.25	3.55	4.99	60	93.5	0.52	2.234
239	female	16.36	55	43	99	73	67.5	5.97	4.316	2.3	0	0.5	2.911
278	female	16.36	70	63	93	71	74.25	16.58	3.302	60	82	0.44	3.25
277	female	16.38	66	74	81	67	72	6.92	4.215	60	90.5	0.43	3.218
245	female	16.39	64	91	105	76	84	3.95	1.786	60	105.5	0.49	2.328
275	female	16.4	81	77	103	87	87	3.7	3.134	60	92	0.46	2.722
30	female	16.48	56	94	135	96	95.25	3.97	2.819	60	115	0.49	2.56
169	female	16.51	110	74	107	67	89.5	6.33	2.018	39.38	93	0.54	2.261
167	female	16.53	123	90	112	76	100.25	2.47	3.373	60	105	0.47	2.509
141	female	16.58	107	83	119	84	98.25	6.07	0.921	60	98.5	0.58	1.772
100	female	16.6	89	116	130	90	106.25	5.72	-1.415	32.1	92	0.54	2.679
109	female	16.61	81	100	114	92	96.75	10.77	0.971	58.6	98	0.54	1.859
63	female	16.68	89	79	106	82	89	7.1	3.332	60	83.5	0.55	3.188
247	female	16.69	94	80	109	87	92.5	4.2	1.515	60	100	0.51	2.084
310	female	16.77	84	76	109	75	86	7.22	2.318	42.8	83	0.55	3.499
68	female	16.8	87	88	109	73	89.25	7.48	1.17	48.51	99	0.59	2.888
37	female	16.82	90	67	110	86	88.25	4.21	2.134	58.9	92.5	0.51	2.73
62	female	16.98	82	78	106	73	84.75	4.78	6.045	60	97	0.53	1.897
286	female	17	89	74	124	73	90	5.52	3.313	60	86	0.46	2.956
319	female	17.01	63	85	94	87	82.25	14.68	1.617	45.55	83	0.48	2.729
33	female	17.06	79	85	106	77	86.75	7.82	2.78	40.35	94.5	0.51	2.29
240	female	17.17	99	76	96	69	85	7.2	1.511	26.4	94.5	0.53	3.039
71	female	17.26	75	80	108	82	86.25	9.37	1.5	26.7	96.5	0.4	2.891
200	female	17.35	93	80	92	82	86.75	2.58	2.943	60	90.5	0.57	3.381
32	female	17.39	89	86	113	82	92.5	7.23	0.954	60	93	0.49	2.33
171	female	17.43	79	76	95	67	79.25	4.62	1.304	60	88	0.52	2.828
107	female	17.44	76	92	106	92	91.5	0.88	0.98	52.4	92	0.5	3.053
208	female	17.56	100	89	110	89	97	3.05	1.416	60	108	0.49	1.92
272	female	17.6	115	86	106	79	96.5	3.57	1.78	60	94.5	0.48	2.033
35	female	17.7	90	73	116	79	89.5	18	0.468	53.65	103.5	0.57	3.65
36	female	17.75	100	91	108	92	97.75	9.42	6.465	60	87.5	0.54	2.73
281	female	17.77	56	68	92	70	71.5	13.82	2.414	60	65.5	0.4	2.861
131	female	17.91	68	86	145	79	94.5	3.12	1.817	45.09	91	0.52	2.615
95	female	17.97	55	70	97	75	74.25	11.18	0.059	22.7	90	0.42	2.258
269	female	18.01	93	79	116	58	86.5	13.9	3.531	60	86.5	0.53	2.612
60	female	18.2	65	81	105	82	83.25	7.58	5.72	4.62	89	0.54	2.903
202	female	18.4	88	105	114	84	97.75	8.58	1.445	60	81	0.47	1.559
318	female	18.4	95	86	118	95	98.5	8.53	1.75	54.75	99	0.49	2.135
317	female	18.46	118	91	115	87	102.75	6.93	1.432	60	89.5	0.51	2.789
207	female	18.47	58	81	94	76	77.25	4.88	2.738	60	91	0.56	2.483
174	female	18.58	54	81	89	77	75.25	0.47	4.14	58.7	74.5	0.47	2.853
249	female	18.85	97	90	114	86	96.75	2.13	0.391	55.7	87	0.46	2.332
3	male	22.37	55	64	108	84	77.75	7.88	5.387	19.75	87	0.54	2.44
4	male	19.16	54	66	96	69	71.25	4.2	2.077	50.65	92	0.5	2.4
5	male	20.87	77	67	103	74	80.25	4.98	2.151	23.05	71.5	0.49	1.21
9	male	26.17	54	84	103	69	77.5	4.67	1.501	18.65	69	0.59	3.52
10	male	23.72	61	75	117	79	83	10.27	0.629	10.8	89.5	0.61	2.63
11	male	20.77	67	64	82	62	68.75	4.18	3.416	13.6	89.5	0.46	2.52
12	male	23.52	54	74	100	77	76.25	12.77	2.697	10.6	86.5	0.52	2.69
13	male	22.59	68	70	105	86	82.25	9.17	2.71	56.1	100.5	0.5	2.74
16	male	23.06	84	93	113	77	91.75	13.62	3.436	59.05	78.5	0.54	2.63
21	male	20.37	96	90	133	82	100.25	5.8	0.644	40.5	105	0.48	1.37
39	male	29.73	55	68	90	72	71.25	5.57	4.199	8.28	78.5	0.51	3.16
40	male	25.25	81	84	114	91	92.5	12.42	3.705	45	92.5	0.55	1.69
41	male	19.78	74	76	117	76	85.75	4.5	5.431	37.94	88	0.67	2.48
43	male	21.67	63	84	77	88	78	13.43	1.86	26.18	82.5	0.54	2.19
46	male	22.5	54	77	100	82	78.25	7.5	3.963	14.14	74.5	0.5	2.9
47	male	19.96	92	70	119	79	90	6.57	5.366	12.44	85	0.5	2.4
51	male	20.11	65	96	110	86	89.25	7.1	3.107	34.71	76	0.46	1.808
52	male	20.74	101	96	130	99	106.5	6.03	1.713	60	109.5	0.49	1.944
53	male	21.44	53	67	95	61	69	7.7	2.944	6.37	66	0.62	3.392
55	male	26.63	67	82	92	62	75.75	5.43	1.76	34.13	73	0.54	2.257
74	male	25.61	66	57	92	75	72.5	8.82	-0.429	13.51	81.5	0.51	3.47
76	male	21.9	59	87	100	88	83.5	11.3	3.87	60	92	0.51	2.522
77	male	20.92	56	76	108	88	82	8.67	3.629	43.45	94.5	0.44	1.966
78	male	25.8	54	79	113	73	79.75	7.2	1.24	16.4	85.5	0.45	2.314
79	male	22.3	83	74	108	86	87.75	7.65	2.154	31.45	90.5	0.49	1.395
80	male	19.43	64	82	119	92	89.25	5.32	3.229	12.65	94	0.53	2.424
81	male	21.42	82	85	118	101	96.5	1.18	-0.755	60	89	0.54	2.405
84	male	21.95	53	77	112	84	81.5	3.88	0.078	22.75	81	0.53	1.951
89	male	21.68	90	102	127	105	106	5.17	-0.126	60	93.5	0.65	2.396
92	male	18.33	67	76	109	77	82.25	16.55	1.116	20.25	93	0.51	1.755
115	male	25.99	53	93	111	77	83.5	10	3.391	31.6	80.5	0.5	2.179
116	male	21.37	71	89	126	92	94.5	8.62	3.62	60	97.5	0.45	2.4
119	male	24.15	60	52	82	52	61.5	2.43	4.094	14.44	77.5	0.47	1.407
120	male	21.43	75	73	105	86	84.75	5.6	3.265	60	97.5	0.52	2.459
121	male	22.95	61	79	108	92	85	7.55	3.396	45.6	79.5	0.53	2.134
123	male	18.51	76	68	86	67	74.25	9.8	5.162	13.78	100.5	0.53	1.891
126	male	22.83	66	72	102	90	82.5	6.75	5.17	60	95	0.57	1.878
128	male	20.92	105	92	117	63	94.25	8	2.389	51.5	77	0.48	2.05
146	male	18.23	104	98	98	79	94.75	6.35	2.082	60	81.5	0.49	2.128
149	male	19.2	77	103	123	89	98	5.68	3.362	39.13	92.5	0.42	2.661
150	male	27.96	54	70	106	74	76	0.9	2.21	17.46	92	0.47	1.931
151	male	25.02	55	80	94	73	75.5	3.85	1.155	7.81	86	0.47	2.342
152	male	28.61	51	55	100	58	66	3.58	2.223	9.28	85	0.49	2.309
153	male	28.18	52	47	102	58	64.75	5.37	2.13	16.24	57.5	0.43	1.24
154	male	26.92	51	52	68	67	59.5	3.55	3.676	16.24	74	0.44	2.616
156	male	22.12	80	86	102	67	83.75	8.35	1.805	38.04	86	0.56	2.56
157	male	23	59	79	104	73	78.75	5.42	3.325	28.2	91.5	0.56	1.912
158	male	21.8	99	85	107	77	92	3.82	2.689	22.39	85	0.45	1.807
161	male	24.15	59	66	72	74	67.75	3.97	3.099	12.37	92	0.54	2.369
162	male	25.67	63	62	70	64	64.75	3.55	2.626	23.03	78.5	0.52	2.226
181	male	19.55	78	82	101	77	84.5	8.05	3.544	60	98.5	0.43	2.243
182	male	23.16	77	73	94	62	76.5	6	3.277	60	89	0.46	0.69
184	male	21.64	53	76	101	69	74.75	7.2	2.959	20.35	77	0.47	1.771
185	male	22.59	72	96	123	100	97.75	3.32	1.028	60	89	0.44	1.069
186	male	21.89	53	64	85	71	68.25	6.17	3.059	60	75.5	0.52	2.091
187	male	24.86	56	74	103	87	80	5.92	2.815	51.13	82.5	0.5	1.142
188	male	21.47	76	94	96	82	87	3.58	1.06	41.97	100.5	0.49	1.978
189	male	22.22	51	55	93	64	65.75	8.5	1.499	1.82	93	0.47	2.087
191	male	22.58	71	87	124	69	87.75	6.33	0.067	5.77	80.5	0.54	2.103
193	male	22.75	66	78	101	84	82.25	8.07	4.079	60	96.5	0.49	2.586
195	male	25.52	68	89	93	72	80.5	4.88	12.302	36.97	87.5	0.6	2.237
197	male	26.36	64	107	121	77	92.25	4.6	1.791	49.26	82.5	0.44	1.128
218	male	26.28	72	70	99	73	78.5	5.2	3.137	49.3	89	0.5	1.541
219	male	31.76	56	51	79	74	65	3.85	1.796	21.9	74	0.49	2.105
220	male	22.22	80	81	125	71	89.25	4.5	3.599	43	88	0.5	1.329
221	male	23	73	70	112	73	82	3.97	2.402	38.15	74	0.39	1.331
223	male	28.96	54	56	102	58	67.5	5.35	3.022	22.25	80.5	0.42	1.63
224	male	21.57	54	91	112	72	82.25	14.35	2.998	41.15	96.5	0.5	2.324
252	female	23.58	67	80	92	67	76.5	6.3	1.961	6.2	90.5	0.45	2.336
253	female	26.97	56	63	103	71	73.25	7.42	1.322	20.25	81	0.54	1.846
254	female	21.66	72	78	130	84	91	7.13	2.313	21.5	76	0.51	1.289
256	female	19.32	79	71	92	71	78.25	10.35	1.774	44	89.5	0.44	1.957
257	female	25.02	52	66	79	69	66.5	6.23	2.898	57	72	0.42	3.066
261	female	25.6	82	69	102	89	85.5	8.82	4.952	58.5	88	0.39	2.346
262	female	23.97	74	88	108	69	84.75	3.98	3.46	60	84	0.46	3.294
263	female	26.41	63	56	68	71	64.5	9.88	4.033	39	82.5	0.55	2.504
264	female	20.13	79	75	103	89	86.5	4.92	2.768	37	93.5	0.44	2.123
266	female	25.94	64	74	118	74	82.5	4.85	1.888	49	111.5	0.49	2.405
268	female	33.13	51	61	63	56	57.75	13.6	3.492	18.5	83	0.53	2.668
287	female	22.32	60	70	94	66	72.5	8.6	1.079	53.1	86.5	0.5	3.138
288	female	20.55	68	76	109	73	81.5	4.55	0.281	53.5	83.5	0.48	2.231
291	female	24.43	73	85	120	102	95	3.57	4.861	19.25	73	0.38	2.171
292	female	23.9	83	87	125	84	94.75	10.52	0.26	60	85	0.5	2.134
293	female	25.72	65	84	98	102	87.25	13.68	1.631	45.8	89	0.47	2.316
295	female	19.08	78	77	114	77	86.5	5.57	2.975	60	87	0.51	1.984
296	female	28.01	55	58	100	88	75.25	7.13	2.09	17.4	85	0.52	1.671
297	female	18.54	77	91	103	84	88.75	2.52	2.081	38.55	90.5	0.48	1.911
298	female	23.56	103	75	109	84	92.75	1.37	-0.377	26.4	91	0.45	1.81
300	female	22.62	84	90	115	92	95.25	7.81	1.949	60	87	0.5	2.35
302	female	24.28	72	85	114	92	90.75	4.95	1.23	43.1	93	0.55	2.515
23	female	21.92	54	53	82	60	62.25	12.95	2.272	16.9	95	0.55	2.29
24	female	21.61	62	71	93	84	77.5	10.07	3.117	3.65	77	0.45	2.24
31	female	19.51	94	79	130	86	97.25	4.83	1.402	60	97	0.46	1.9
57	female	25.95	70	96	93	64	80.75	3.28	2.605	54.04	74.5	0.43	3.269
58	female	22.36	89	93	120	90	98	8.43	0.708	8.92	88	0.49	1.997
61	female	18.88	63	82	115	90	87.5	8.63	1.737	41	86.5	0.52	2.461
64	female	18.37	56	71	87	86	75	5.38	1.548	30.49	87	0.45	2.196
70	female	24.11	55	62	131	76	81	8.17	4.774	12.7	87	0.49	1.869
72	female	29.93	62	68	87	77	73.5	9.45	1.572	43.15	73.5	0.47	2.736
73	female	18.33	65	69	95	75	76	34.9	1.593	10.95	94.5	0.54	3.38
97	female	19.94	67	70	92	86	78.75	9.02	0.096	24.6	88.5	0.4	4.033
106	female	20.02	68	79	116	91	88.5	5.13	0.17	22.75	84	0.49	2.546
140	female	25.93	53	73	106	84	79	4.25	3.84	19	81	0.46	3.719
144	female	19.6	87	75	130	91	95.75	3.58	3.289	60	85	0.52	2.169
163	female	26.2	54	74	103	74	76.25	10.6	1.774	39.18	72.5	0.5	3.569
164	female	20.48	58	70	84	71	70.75	6.58	4.919	44.55	86.5	0.35	2.233
166	female	19.39	85	101	109	82	94.25	5.1	4.921	41.64	86.5	0.52	2.708
168	female	20.92	87	66	92	76	80.25	7.58	2.139	45.09	105.5	0.46	2.332
170	female	24.21	51	70	93	69	70.75	12.87	4.165	52.8	81.5	0.53	2.902
172	female	19.17	70	69	96	79	78.5	9.02	2.888	11.76	81	0.55	2.977
173	female	21.88	76	83	90	88	84.25	6.87	4.44	41.62	84	0.47	3.151
176	female	22.98	87	79	109	67	85.5	6.3	0.983	23.99	86	0.48	3.574
177	female	19.94	66	73	101	72	78	6.88	2.714	60	95	0.5	1.853
206	female	22.68	47	56	80	73	64	7.03	4.07	60	94.5	0.48	1.79
211	female	21.37	82	79	92	82	83.75	5.8	0.888	60	107.5	0.55	3.202
212	female	23.11	60	70	90	82	75.5	3.05	0.634	57.09	93	0.49	2.584
233	female	20.45	83	69	58	33	60.75	4.63	1.403	37.35	91.5	0.46	2.904
236	female	21.32	67	58	85	73	70.75	8.88	2.143	19.55	82.5	0.46	2.407
243	female	24.19	78	89	106	75	87	5.23	3.615	42.95	78.5	0.51	2.841
270	female	20.25	67	79	88	67	75.25	7.4	6.27	50.5	88.5	0.56	3.095
273	female	23.1	92	83	102	66	85.75	1.52	2.204	60	83.5	0.38	2.544
274	female	20.65	56	60	71	73	65	17.22	4.452	47	82	0.51	2.645
279	female	20.36	90	72	101	77	85	6.68	3.674	60	89	0.39	2.087
282	female	26.48	83	89	110	84	91.5	11.47	1.656	60	78.5	0.4	1.667
284	female	22.59	66	67	90	72	73.75	4.92	2.383	60	77.5	0.51	2.251
285	female	24.03	77	67	81	73	74.5	8.67	2.775	60	82	0.52	2.764
307	female	19.83	72	75	90	79	79	4.15	1.848	58.15	102.5	0.53	2.034
313	female	20.83	49	77	81	76	70.75	10.97	0.811	50.3	80	0.47	2.679
314	female	29.23	70	67	119	71	81.75	9.95	1.004	37.15	87.5	0.51	2.49
315	female	27.03	58	49	83	67	64.25	7.65	0.747	53.65	85.5	0.56	3.48
320	female	19.32	88	88	108	92	94	15.93	1.783	60	96	0.41	2.839
